# Supplementary material for: An investigation on the origin of regional spring time ozone episodes in the Western Mediterranean and Central Europe
Source: Copernicus journal article supplement (doi:10.5194/acp-2016-615), 2016-08-29
Supplement: Supplementary file [file acp-2016-615-AC3-supplement.pdf]

### **Interactive comment, 3.**

The paper by Kalabokas et al. strongly relies on ozone observations from various measurement networks and platforms but none of the data providers is properly accredited in the acknowledgements. I am part of the operators team of the Swiss National Air Pollution Monitoring Network – which is one of the providers of the EMEP data used here, namely Payerne (CH02) and Chaumont (CH04), even though I am not directly involved in any of the used observations. In other words, I am not writing to claim any personal credits. However, our network's funding partly relies on a sound annual reporting proofing the interest in our observations by the (scientific) community. Therefore, a proper acknowledgement in publications using our data is vital for the long-term operation of the measurements. This is also true for many other monitoring networks. As host of the WMO/GAW Quality Assurance / Science Activity Centre Switzerland (QA/SACCH), we also continuously promote the timely submission of data to the international data repositories. Missing credit for data made publicly available is one of the main arguments against a (fast) provision of the time series. Thus, the missing declaration of the data source will also jeopardize similar analysis in the long run. Moreover, the EMEP/EBAS data policy accessibly on the EBAS webpage clearly reads: "For scientific purposes, access to these data is unlimited and provided without charge. By their use you accept that an offer of co-authorship will be made through personal contact with the data providers or owners whenever substantial use is made of their data. In all cases, an acknowledgement must be made to the data providers or owners and to the project name when these data are used within a publication."

### **Authors Response (in Italics)**

*We really apologize for the lack of particular acknowledgement to the operators of the air quality stations, thinking that mentioning the EMEP programme and its data platform would be sufficient. We agree totally with the spirit of this comment. So, for that purpose, we will add at first a reference for the EMEP program (EMEP, Chemical Coordinated Center, [www.emep.int](http://www.emep.int)) as well as the station names and their geographical coordinates in the manuscript text (Data and Methodology section).*

*Finally, we will add the following sentence at the end of acknowledgements. "Our particular thanks go to the operators of the following air quality stations: Cabo de Creus in Spain, Morvan and Montandon in France, Payerne and Chaumont in Switzerland, Montelibretti and Ispra in Italy and Giordan Lighthouse in Malta".*

*The corresponding changes in the revised manuscript are highlighted in blue color.*
